# Supplementary material for: East Midlands knee pain multiple randomised controlled trial cohort study: cohort establishment and feasibility study protocol
Source: PubMed Central journal article supplement — BMJ Open. 2020 Sep 9;10(9):e037760. doi: 10.1136/bmjopen-2020-037760 (PMC7482502; doi:10.1136/bmjopen-2020-037760), 2020-09-09
Supplement: bmjopen-2020-037760supp001.pdf [file bmjopen-2020-037760supp001.pdf]

Additional File 1:  
Quantitative Fidelity Checklist for non-pharmacological component of intervention

| <b>Session 1:</b>                             |                                                                         | Complete | Not completed | Partially completed | Not applicable |
|-----------------------------------------------|-------------------------------------------------------------------------|----------|---------------|---------------------|----------------|
| <b>Intervention categories</b>                | <b>Individual components</b>                                            |          |               |                     |                |
| <b>Materials</b>                              |                                                                         |          |               |                     |                |
|                                               | ARUK booklet on OA                                                      |          |               |                     |                |
|                                               | Exercise/activity diary                                                 |          |               |                     |                |
|                                               | Goal Setting forms                                                      |          |               |                     |                |
| <b>Introduction</b>                           |                                                                         |          |               |                     |                |
|                                               | Introductions                                                           |          |               |                     |                |
|                                               | Aim of interventions                                                    |          |               |                     |                |
|                                               | Content                                                                 |          |               |                     |                |
|                                               | Structure                                                               |          |               |                     |                |
| <b>Holistic assessment of person with OA.</b> |                                                                         |          |               |                     |                |
|                                               | Illness perception of OA explored                                       |          |               |                     |                |
|                                               | Pain severity explored                                                  |          |               |                     |                |
|                                               | Pain impact on occupation or social activity explored                   |          |               |                     |                |
|                                               | Current level of physical activity/ exercise and its intensity explored |          |               |                     |                |
|                                               | Views and attitudes to weight loss explored (if required)               |          |               |                     |                |
|                                               | Issues with mood explored                                               |          |               |                     |                |
|                                               | Sleep quality explored                                                  |          |               |                     |                |
|                                               | Support network and caregiver involvement discussed                     |          |               |                     |                |
|                                               | Co-morbidities                                                          |          |               |                     |                |
|                                               | Other MSK pain                                                          |          |               |                     |                |
|                                               | Inspection of knee                                                      |          |               |                     |                |
|                                               | Palpation of knee                                                       |          |               |                     |                |
|                                               | Active ROM                                                              |          |               |                     |                |
|                                               | Passive ROM                                                             |          |               |                     |                |
|                                               | Observation of Gait                                                     |          |               |                     |                |
| <b>Education</b>                              |                                                                         |          |               |                     |                |
|                                               | Illness perception of OA addressed                                      |          |               |                     |                |
|                                               | Nature of OA discussed                                                  |          |               |                     |                |
|                                               | Core treatments for OA addressed                                        |          |               |                     |                |
|                                               | Rationale for self-management strategies addressed                      |          |               |                     |                |
|                                               | Physical Activity /benefits of exercise addressed                       |          |               |                     |                |
|                                               | Activity rest cycle/pacing explained                                    |          |               |                     |                |
|                                               | Reflection on activity/pacing and recommendations discussed             |          |               |                     |                |
|                                               | Participants had the chance to contribute to discussion                 |          |               |                     |                |
| <b>Exercise</b>                               |                                                                         |          |               |                     |                |
|                                               | Warm up exercises explained/demonstrated                                |          |               |                     |                |
|                                               | Aerobic exercises explained/demonstrated                                |          |               |                     |                |
|                                               | Strengthening explained/demonstrated                                    |          |               |                     |                |
|                                               | Stretching exercises explained/demonstrated                             |          |               |                     |                |
|                                               | Participants had the chance to practice prescribed exercises            |          |               |                     |                |
|                                               | Exercise corrected if required                                          |          |               |                     |                |
|                                               | Smart goals setting                                                     |          |               |                     |                |
|                                               | Action planning to carry out exercise                                   |          |               |                     |                |
|                                               | Patients' level of confidence for the exercise programme determined     |          |               |                     |                |
|                                               | Barriers and facilitators identified (if confidence low)                |          |               |                     |                |
| <b>Weight loss (if required)</b>              |                                                                         |          |               |                     |                |
|                                               | Previous efforts to lose weight discussed                               |          |               |                     |                |
|                                               | Healthy BMI range and weight loss discussed                             |          |               |                     |                |

## Additional File 1:

## Quantitative Fidelity Checklist for non-pharmacological component of intervention

|                                                                                                                                   |  |  |  |  |
|-----------------------------------------------------------------------------------------------------------------------------------|--|--|--|--|
| 5% weight loss goal calculated with timescale                                                                                     |  |  |  |  |
| Agree weight loss goal                                                                                                            |  |  |  |  |
| Action plan for weight loss                                                                                                       |  |  |  |  |
| Discuss strategies for weight loss (calorie deficit, portion size, meal planning, tops tips, slimming groups, increasing PA etc ) |  |  |  |  |
| Signpost to NHS weight loss plan                                                                                                  |  |  |  |  |
| Patients' level of confidence for weight loss goal determined                                                                     |  |  |  |  |
| Barriers and facilitators identified (if confidence low)                                                                          |  |  |  |  |
| <b>Adjunct treatments</b>                                                                                                         |  |  |  |  |
| Use of heat/cold discussed                                                                                                        |  |  |  |  |
| Walking aids discussed                                                                                                            |  |  |  |  |
| Footwear discussed                                                                                                                |  |  |  |  |
| <b>Review and planning</b>                                                                                                        |  |  |  |  |
| Session review: goal setting synopsis and action plan                                                                             |  |  |  |  |

Complete = component was fully delivered by the nurse

Not Complete = component was not delivered by the nurse

Partially completed = there was an attempt to deliver this component by the nurse but it was not delivered fully

Not applicable = component was not applicable for example weight loss components if the participant had a body mass index < 25

Fidelity scores will be calculated for each category and each session as the percentage of completed components from the total number of components. Components which were not applicable will be excluded from the overall total.

## Additional File 1:

## Quantitative Fidelity Checklist for non-pharmacological component of intervention

| <b>Follow up session 2, 3:</b>   | Complete                                                                           | Not Completed | Partially completed | Not applicable |
|----------------------------------|------------------------------------------------------------------------------------|---------------|---------------------|----------------|
| <b>Intervention categories</b>   | <b>Individual components</b>                                                       |               |                     |                |
| <b>Assessment</b>                |                                                                                    |               |                     |                |
|                                  | Pain symptoms since previous visit explored                                        |               |                     |                |
|                                  | Factors influencing pain explored                                                  |               |                     |                |
|                                  | Physical activity's levels explored                                                |               |                     |                |
| <b>Education</b>                 |                                                                                    |               |                     |                |
|                                  | Activity rest cycle/pacing explained                                               |               |                     |                |
|                                  | Individual reflection on activity-rest cycle/pacing facilitated                    |               |                     |                |
|                                  | Physical activity's levels addressed                                               |               |                     |                |
|                                  | Participants had the chance to contribute to discussion                            |               |                     |                |
| <b>Exercise</b>                  |                                                                                    |               |                     |                |
|                                  | Exercise goals and action plan reviewed                                            |               |                     |                |
|                                  | Exercise/activity diary reviewed                                                   |               |                     |                |
|                                  | Problem solving of previous weeks' action plan                                     |               |                     |                |
|                                  | Previous session exercises reviewed and performed by the participant               |               |                     |                |
|                                  | Exercise corrected if required                                                     |               |                     |                |
|                                  | Smart goals reviewed                                                               |               |                     |                |
|                                  | Strengthening exercises progressed or adapted                                      |               |                     |                |
|                                  | Aerobic exercises progressed or adapted                                            |               |                     |                |
|                                  | Participants had the chance to practice strengthening exercises                    |               |                     |                |
|                                  | Patients' level of confidence for the exercise programme determined                |               |                     |                |
|                                  | Barriers and facilitators carrying out the exercise identified (if confidence low) |               |                     |                |
| <b>Weight loss (if required)</b> |                                                                                    |               |                     |                |
|                                  | Weight loss goal and action plan reviewed                                          |               |                     |                |
|                                  | Weight reviewed                                                                    |               |                     |                |
|                                  | Action plan updated                                                                |               |                     |                |
|                                  | Patients' level of confidence for weight loss goal determined                      |               |                     |                |
|                                  | Barriers and facilitators identified (if confidence low)                           |               |                     |                |
| <b>Adjunct treatments</b>        |                                                                                    |               |                     |                |
|                                  | Use of heat/cold discussed                                                         |               |                     |                |
|                                  | Walking aids discussed                                                             |               |                     |                |
|                                  | Footwear discussed                                                                 |               |                     |                |
| <b>Review and planning</b>       |                                                                                    |               |                     |                |
|                                  | Session review: goal setting synopsis and action plan                              |               |                     |                |

## Additional File 1:

## Quantitative Fidelity Checklist for non-pharmacological component of intervention

| <b>Final session:</b>                                                              | Complete | Not completed | Partially completed | Not applicable |
|------------------------------------------------------------------------------------|----------|---------------|---------------------|----------------|
| <b>Intervention categories</b>                                                     |          |               |                     |                |
| <b>Individual components</b>                                                       |          |               |                     |                |
| <b>Assessment</b>                                                                  |          |               |                     |                |
| Pain symptoms since previous visit explored                                        |          |               |                     |                |
| Factors influencing pain explored                                                  |          |               |                     |                |
| Physical activity's levels explored                                                |          |               |                     |                |
| <b>Education</b>                                                                   |          |               |                     |                |
| Long-term self-management addressed                                                |          |               |                     |                |
| Participants had the chance to contribute to discussion                            |          |               |                     |                |
| <b>Exercise</b>                                                                    |          |               |                     |                |
| Exercise goals and action plan reviewed                                            |          |               |                     |                |
| Exercise/activity diary reviewed                                                   |          |               |                     |                |
| Problem solving of previous weeks' action plan                                     |          |               |                     |                |
| Participants had the chance to attempt and practice previous exercises             |          |               |                     |                |
| Exercise corrected if required                                                     |          |               |                     |                |
| Patients' level of confidence for the exercise programme determined                |          |               |                     |                |
| Barriers and facilitators carrying out the exercise identified (if confidence low) |          |               |                     |                |
| Exercises aiming for long term management given                                    |          |               |                     |                |
| <b>Weight loss (if required)</b>                                                   |          |               |                     |                |
| Weight loss goal and action plan reviewed                                          |          |               |                     |                |
| Weight reviewed                                                                    |          |               |                     |                |
| Action plan updated                                                                |          |               |                     |                |
| Patients' level of confidence for weight loss goal determined                      |          |               |                     |                |
| Barriers and facilitators identified (if confidence low)                           |          |               |                     |                |
| Long term action plan for weight loss given                                        |          |               |                     |                |
| <b>Review and planning</b>                                                         |          |               |                     |                |
| Session review – long term goal setting and action planning recap                  |          |               |                     |                |
